# Supplementary figures and images for: Influence of substitution on kinetics and mechanism of ring transformation of substituted S-[1-phenylpyrrolidin-2-on-3-yl]isothiuronium salts
Source: Royal Society of Chemistry journal article supplement (doi:10.1039/b401866d), 2004-01-01

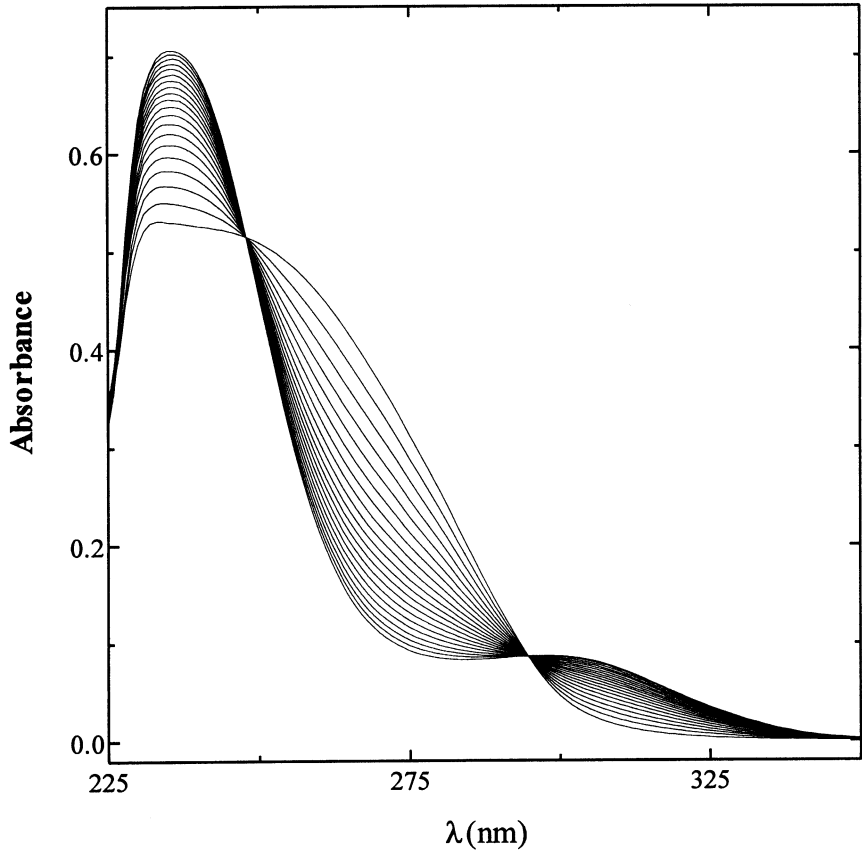

Supplement: b401866d.pdf [file b401866d.pdf]
